# Supplementary material for: NeuroML: A Language for Describing Data Driven Models of Neurons and Networks with a High Degree of Biological Detail
Source: PLOS journal article supplement (doi:10.1371/journal.pcbi.1000815), 2010-06-17
Supplement: S6 (10.1371/journal.pcbi.1000815.s006) [file journal.pcbi.1000815.s006]

### Supporting Figure S5: Network model behavior with longer timestep and coarser spatial discretisation

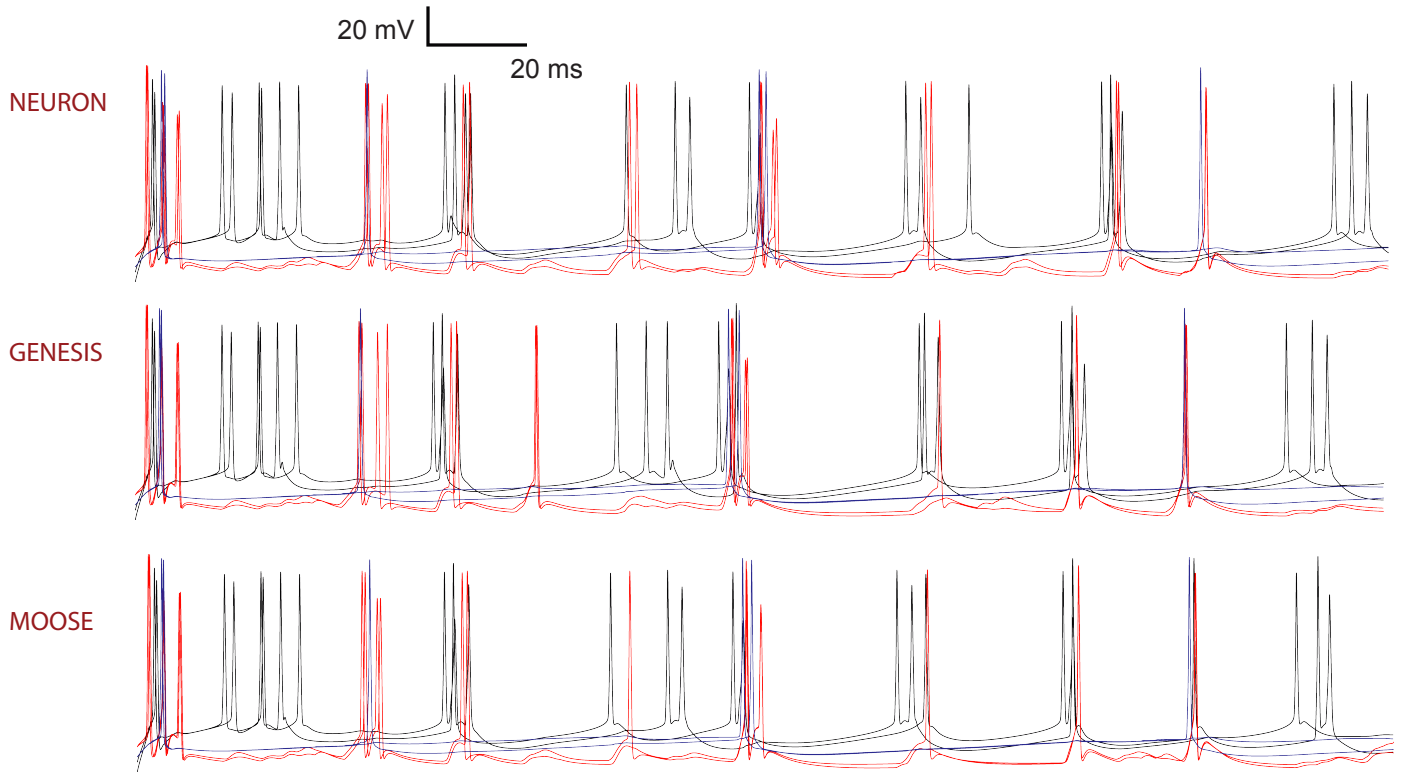

**Figure S5:** Network simulation as in Figure 10. Simulation time step was 0.01 ms, ten times higher than Fig. 10, but still a commonly used value for simulation timestep. The spatial discretisation was approximately halved: values for numbers of numerical integration points in NEURON for RS cell, FRB cell, and interneurons respectively in Fig. 10 were 1300, 769 and 1130; the values used here were 758, 383 and 573.
