# Supplementary material for: NeuroML: A Language for Describing Data Driven Models of Neurons and Networks with a High Degree of Biological Detail
Source: PLOS journal article supplement (doi:10.1371/journal.pcbi.1000815), 2010-06-17
Supplement: S10 (10.1371/journal.pcbi.1000815.s010) [file journal.pcbi.1000815.s010]

**Table S4: List of network connections in reduced Layer 2/3 network**

| Presynaptic → | L23PyrRS         | L23PyrFRB       | SupAxAx     | SupBasket        | SupLTSInter      |
|---------------|------------------|-----------------|-------------|------------------|------------------|
| L23PyrRS      | <b>26g, 900e</b> | <b>8g, 100e</b> | <b>400i</b> | <b>400i</b>      | <b>1200i</b>     |
| L23PyrFRB     | <b>1g, 270e</b>  | <b>1g, 30e</b>  | <b>120i</b> | <b>120i</b>      | <b>360i</b>      |
| SupAxAx       | <b>900e</b>      | <b>100e</b>     | <b>20g</b>  | <b>200i</b>      | <b>200i</b>      |
| SupBasket     | <b>900e</b>      | <b>100e</b>     |             | <b>20g, 200i</b> | <b>200i</b>      |
| SupLTSInter   | <b>900e</b>      | <b>100e</b>     |             | <b>200i</b>      | <b>20g, 200i</b> |

Total numbers of synaptic connections between pre and post synaptic populations. Excitatory connections are suffixed by **e**, inhibitory connections by **i**, electrical synaptic connections at gap junctions by **g**.
