# Supplementary material for: NeuroML: A Language for Describing Data Driven Models of Neurons and Networks with a High Degree of Biological Detail
Source: PLoS Comput Biol. 2010 Jun 17;6(6):e1000815. doi: 10.1371/journal.pcbi.1000815 (PMC2887454; doi:10.1371/journal.pcbi.1000815)
Supplement: Table S3 — List of cell populations in reduced Layer 2/3 network (0.01 MB PDF) [file pcbi.1000815.s009.pdf]

**Table S3: List of cell populations in reduced Layer 2/3 network**

| <b>Population</b> | <b>Cell type</b> | <b>Number in population</b> |
|-------------------|------------------|-----------------------------|
| CG_C04_RS_sm      | L23PyrRS         | 20                          |
| CG_C04_FRB_sm     | L23PyrFRB        | 6                           |
| CG_C04_AxAx_sm    | SupAxAx          | 10                          |
| CG_C04_Bask_sm    | SupBasket        | 10                          |
| CG_C04_LTS_sm     | SupLTSInter      | 10                          |

Names of the populations/cell groups as used in the neuroConstruct project for the reduced L2/3 network model, the types of cell used in each (see Supporting Table S1) and the number of cells in each population.
